# Supplementary material for: IL-18–secreting CAR T cells targeting DLL3 are highly effective in small cell lung cancer models
Source: PubMed Central journal article supplement (PMC10145930; doi:10.1172/jci166028), 2023-05-01
Supplement: jci-133-166028-s130.pdf [file jci-133-166028-s130.pdf]

## **Supplemental Figures**

### **IL-18-secreting CAR T cells targeting DLL3 are highly effective in small cell lung cancer models**

**Janneke E. Jaspers<sup>1</sup>, Jonathan F. Khan<sup>2</sup>, William D. Godfrey<sup>1</sup>, Andrea V. Lopez<sup>1</sup>, Metamia**

**Ciampricotti<sup>1</sup>, Charles M. Rudin<sup>1,3</sup>, Renier J. Brentjens<sup>2,4\*</sup>**

<sup>1</sup>Department of Medicine, Memorial Sloan Kettering Cancer Center; New York, NY, USA. <sup>2</sup>Weill Cornell School of Medicine; New York, NY, USA. <sup>3</sup>Thoracic Oncology, Memorial Sloan Kettering Cancer Center; New York, USA. <sup>4</sup>Department of Medicine, Roswell Park Comprehensive Cancer Center; Buffalo, NY, USA. \*Corresponding Author: Renier J. Brentjens; Roswell Park Comprehensive Cancer Center; Elm and Carlton Streets; Buffalo, NY 14263; 716-845-2300; Renier.Brentjens@RoswellPark.org.

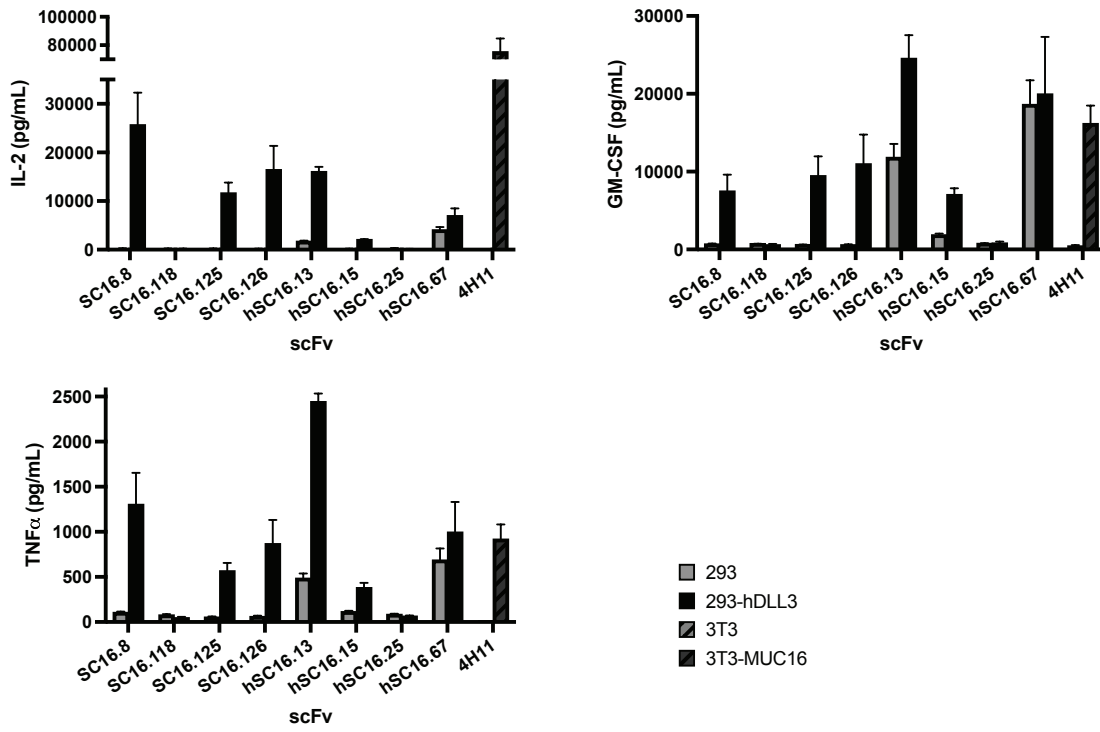

**Supplemental Figure 1**

Corresponding to Figure 1C. Cytokine levels of IL-2, GM-CSF and TNFα in co-cultures of CAR T cells with DLL3<sup>+</sup> 293 cells. 4H11 CAR T cells were co-cultured with 3T3 cells expressing the 4H11 target MUC16.

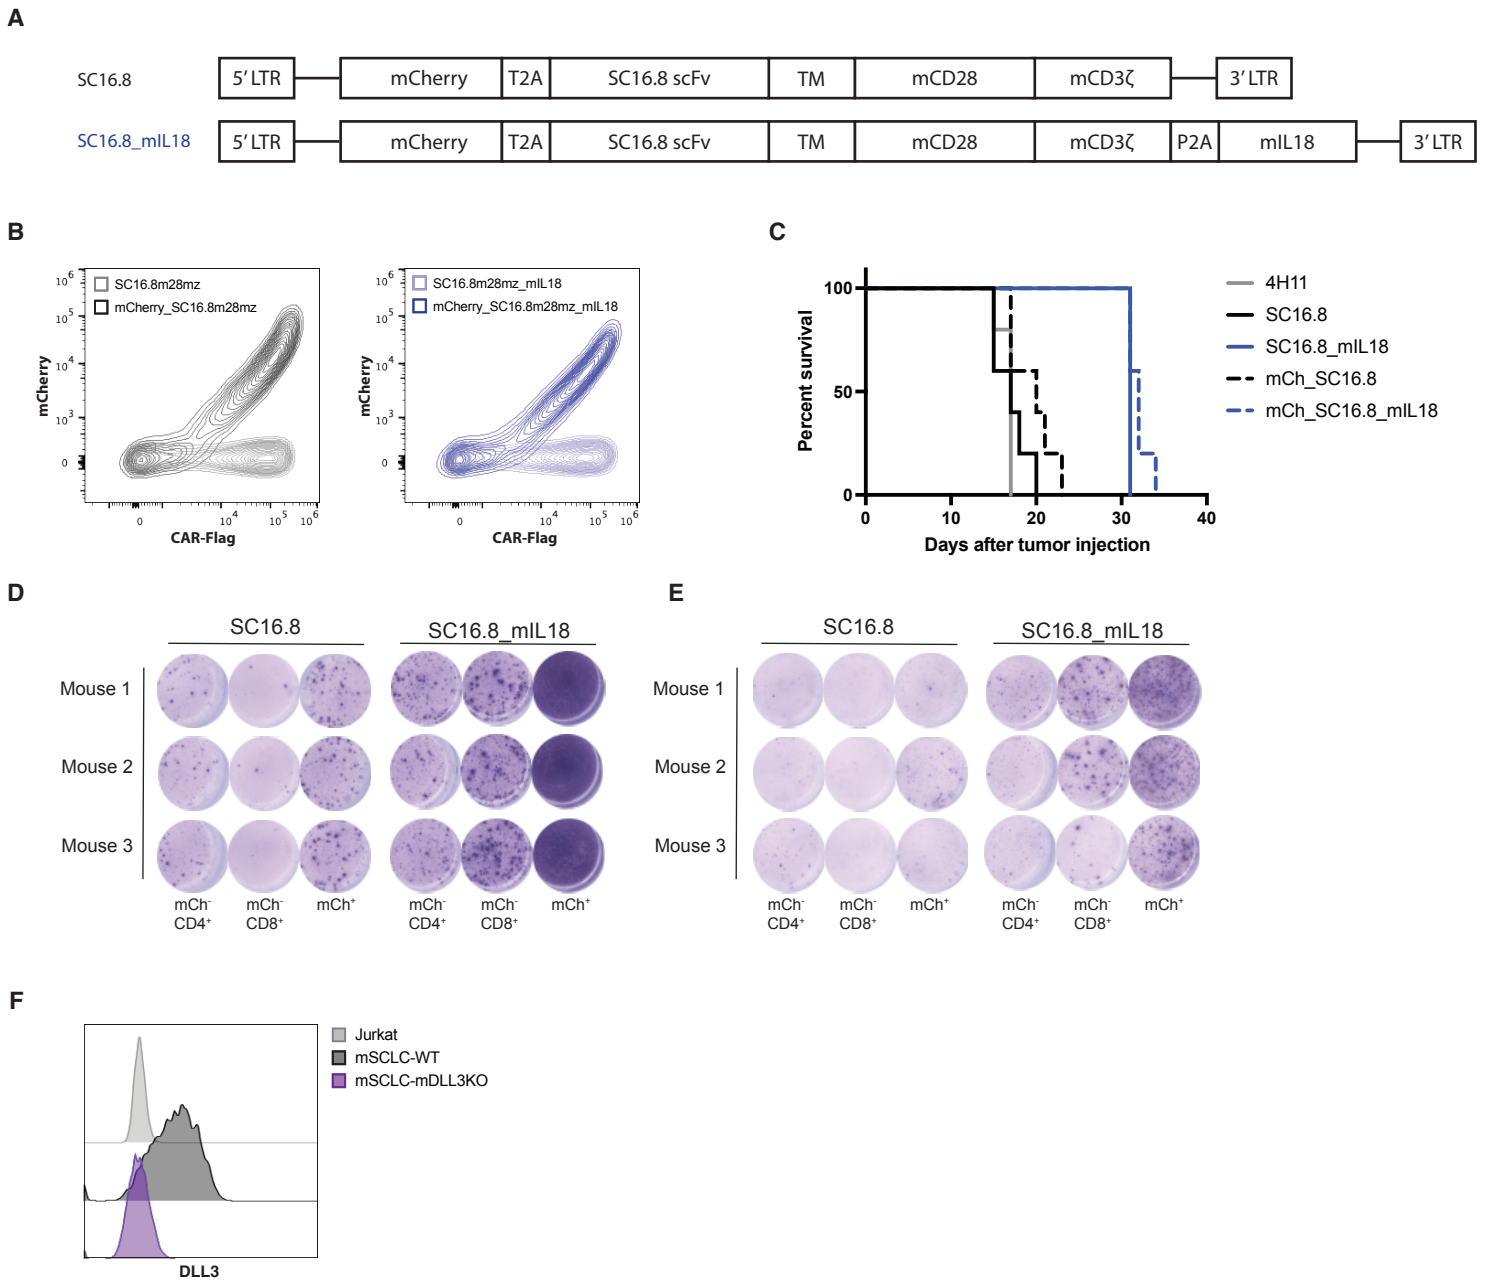

### Supplemental Figure 2

Corresponding to Figure 3. **A)** Schematic of CAR design with mCherry, SC16.8 scFv, murine CD28 and CD3z signaling domains, and the murine IL-18 transgene. **B)** Flow cytometric analysis of murine CAR T cells for mCherry and CAR-Flag expression. **C)** Survival of mSCLC tumor-bearing mice after treatment with mCherry-expressing CAR T cells that do or do not secrete mIL-18, compared to the original mCherry-negative CAR T cells. **D)** and **E)** IFN $\gamma$  ELISPOT results, quantified in Figure 3F, comparing mCherry-negative endogenous CD4 and CD8 tumor-infiltrating lymphocytes from mice treated with SC16.8 or SC16.8\_mIL18 CAR T cells, harvested from mSCLC-bearing livers 3 (**D**) or 6 (**E**) days after CAR T cell treatment. mCherry<sup>+</sup> CAR T cells were isolated and included as positive control. **F)** DLL3 surface expression on DLL3-negative Jurkat cells, DLL3-positive mSCLC cells and DLL3-knockout mSCLC cells.

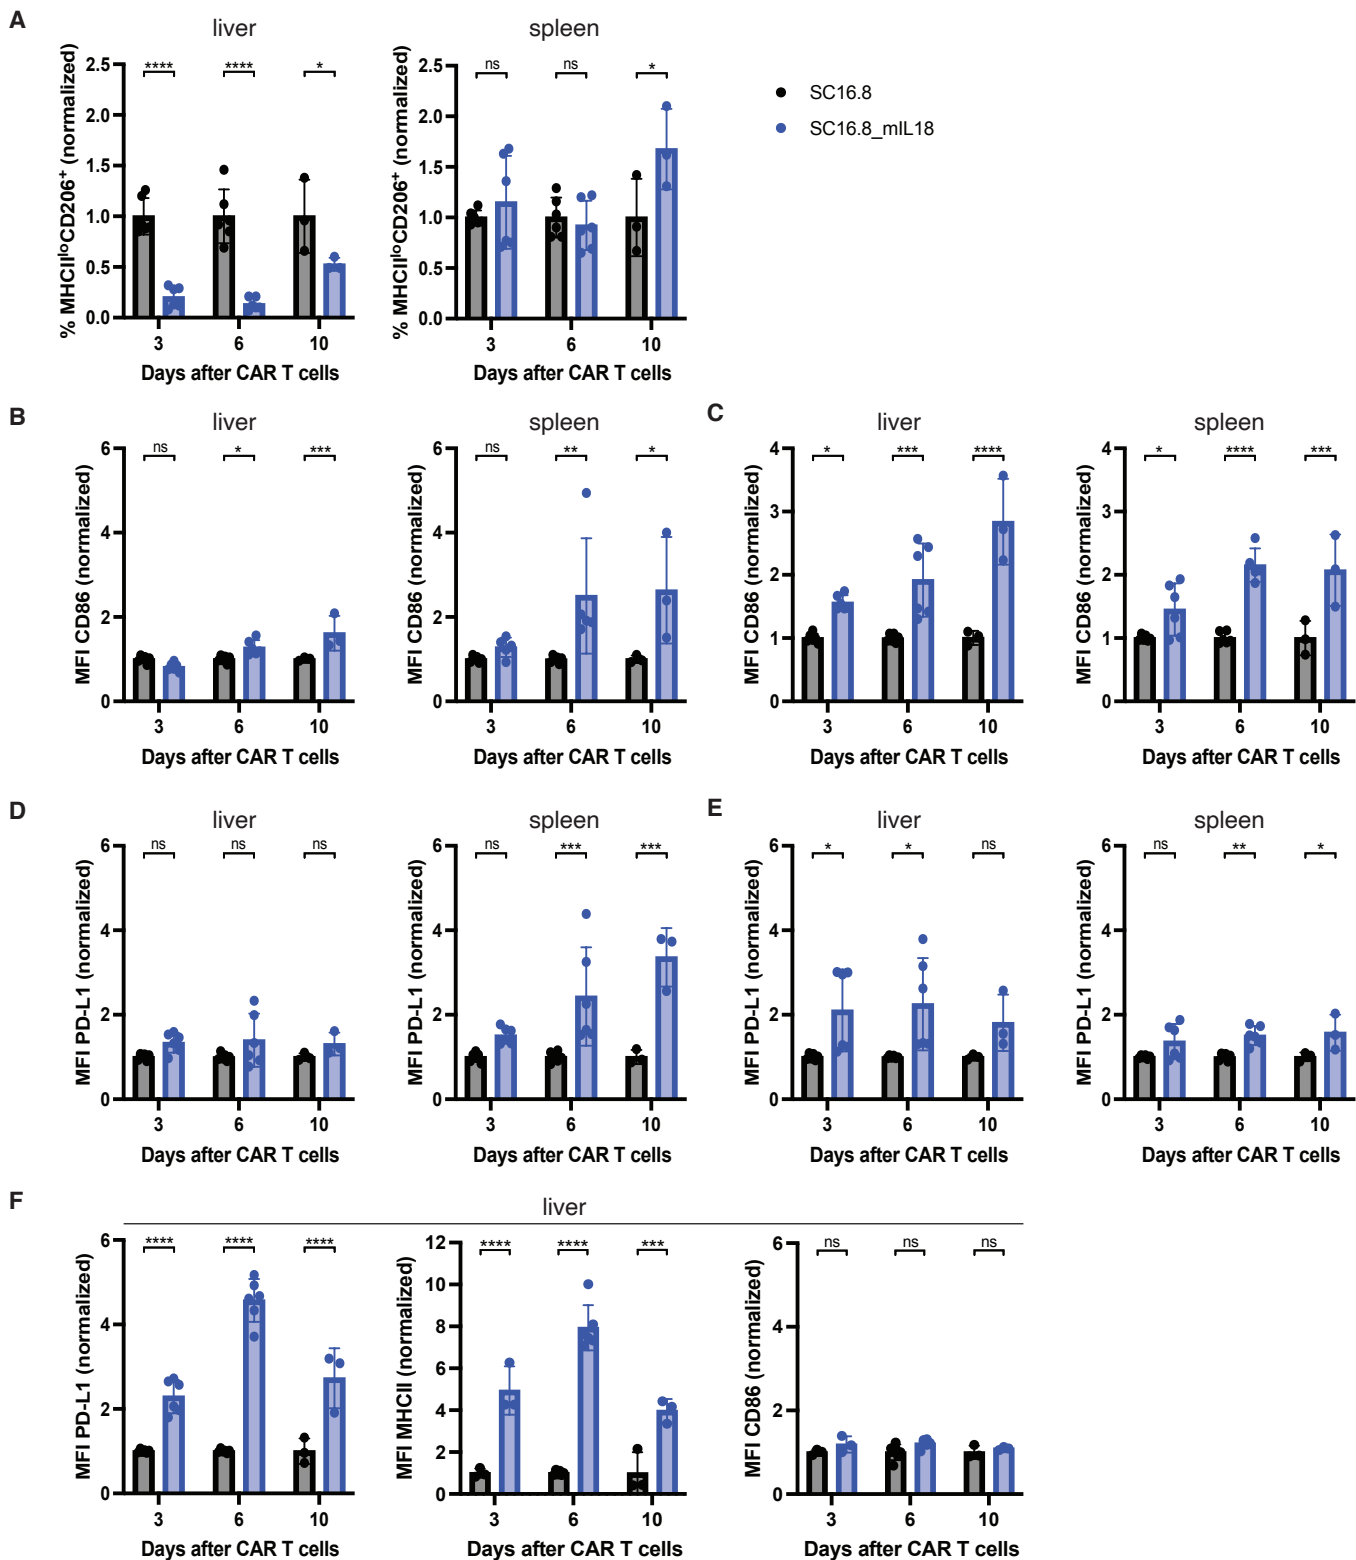

### Supplemental Figure 3

Complete flow cytometric analysis of myeloid cells on days 3, 6 and 10 post CAR T cell treatment in mSCLC-bearing mice, corresponding to Figure 4. **A)** Levels of CD206<sup>+</sup>MHC-II<sup>lo</sup> M2-like macrophages in livers and spleens. **B)** Expression of CD86 on macrophages in livers and spleens. **C)** Expression of CD86 on dendritic cells in livers and spleens. **D)** Expression of PD-L1 on macrophages in livers and spleens. **E)** Expression of PD-L1 on dendritic cells in livers and spleens. **F)** Expression of PD-L1, MHC-II and CD86 on F4/80<sup>+</sup> macrophages in livers.

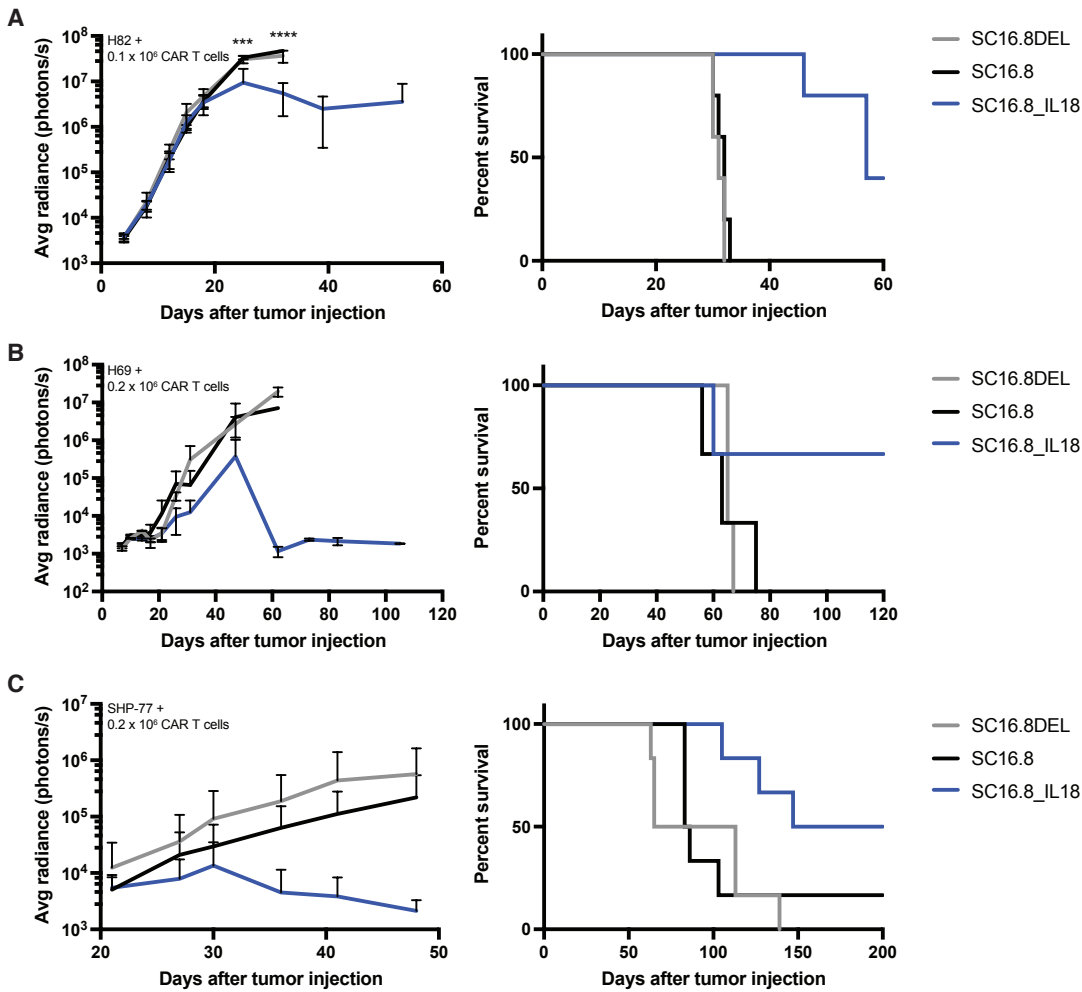

#### Supplemental Figure 4

Efficacy of low-dose SC16.8\_IL18 CAR T cells in SCLC models, corresponding to Figure 5. **A)** Tumor growth and overall survival of mice with metastatic H82 tumors that received  $0.1 \times 10^6$  CAR T cells. **B)** Tumor growth and overall survival of mice with metastatic H69 tumors that received  $0.2 \times 10^6$  CAR T cells. **C)** Tumor growth and overall survival of mice with orthotopic SHP-77 tumors that received  $0.2 \times 10^6$  CAR T cells.
